# Supplementary material for: Electronic and optical properties of orthorhombic (CH3NH3)BX3 (B = Sn, Pb; X = F, Cl, Br, I) perovskites: a first-principles investigation
Source: Royal Society of Chemistry journal article supplement (doi:10.1039/d1ra01586a), 2021-01-01
Supplement: d1ra01586a1.pdf [file d1ra01586a1.pdf]

# Electronic and Optical Properties of Orthorhombic (CH<sub>3</sub>NH<sub>3</sub>)BX<sub>3</sub> (B=Sn, Pb; X=F, Cl, Br, I) Perovskites: a First-Principles Investigation

Sean Nations<sup>1,2</sup>, Ting Jia<sup>1</sup>, Shengnian Wang<sup>2</sup>, Yuhua Duan<sup>1\*</sup>

<sup>1</sup> National Energy Technology Laboratory, United States Department of Energy, Pittsburgh, Pennsylvania 15236, USA

<sup>2</sup> Chemical Engineering Department, Louisiana Tech University, Ruston, Louisiana 71272, USA

## Supplementary Materials

### Contents

|                                                                                                                                                                                                                                                                        |      |
|------------------------------------------------------------------------------------------------------------------------------------------------------------------------------------------------------------------------------------------------------------------------|------|
| <b>Tables S1-S7.</b> The optimized atomic coordinates of (MA)BX <sub>3</sub> (B=Sn, Pb; X= F, Cl, Br, I)                                                                                                                                                               | 2-4  |
| <b>Table S8.</b> The optimized atomic coordinates and energies of AX and BX <sub>2</sub> (B=Sn, Pb; X= F, Cl, Br, I)                                                                                                                                                   | 4    |
| <b>Fig. S2-9.</b> The calculated electronic structural properties for (MA)BX <sub>3</sub> . Figure S9 includes non-SOC calculations for (MA)PbX <sub>3</sub> for comparison.                                                                                           | 5-9  |
| <b>Theory of Optical Properties Calculations</b>                                                                                                                                                                                                                       | 9-10 |
| <b>Fig. S10.</b> The calculated dielectric matrix of (MA)PbX <sub>3</sub> perovskites (halogen comparisons)                                                                                                                                                            | 11   |
| <b>Fig. S11.</b> The calculated dielectric matrix (without SOC) of (MA)SnX <sub>3</sub> perovskites by taking the average of diagonal elements ( $\epsilon^{xx}$ , $\epsilon^{yy}$ , $\epsilon^{zz}$ ). (a) Real part $\epsilon_1$ , (b) Imaginary part $\epsilon_2$ . | 11   |
| <b>Fig. S12.</b> The calculated absorption coefficient ( $\alpha$ ) of (MA)PbX <sub>3</sub> (X=F, Cl, Br, I) versus frequency in wavelength (halogen comparisons)                                                                                                      | 12   |
| <b>Fig. S13.</b> The calculated optical conductivities for <i>Pb</i> and <i>Sn</i> perovskites (halogen comparisons)                                                                                                                                                   | 12   |
| <b>Fig. S14.</b> The calculated index of refraction (n) and extinction coefficient (k) for <i>Pb</i> and <i>Sn</i> perovskites (halogen comparisons)                                                                                                                   | 13   |
| <b>Fig. S15.</b> The calculated reflectivity for <i>Pb</i> and <i>Sn</i> perovskites (halogen comparisons)                                                                                                                                                             | 13   |
| <b>Fig. S16.</b> The calculated absorption coefficient ( $\alpha$ ) of (MA)PbX <sub>3</sub> (X=F, Cl, Br, I) versus frequency in wavelength (metal comparisons)                                                                                                        | 14   |
| <b>Fig. S17.</b> The calculated optical conductivities for <i>Pb</i> and <i>Sn</i> perovskites (halogen comparisons)                                                                                                                                                   | 15   |
| <b>Fig. S18.</b> The calculated index of refraction and extinction coefficient for <i>Pb</i> and <i>Sn</i> perovskites (metal comparisons)                                                                                                                             | 16   |
| <b>Fig. S19.</b> The calculated reflectivity for <i>Pb</i> and <i>Sn</i> perovskites (metal comparisons)                                                                                                                                                               | 17   |
| <b>Reference</b>                                                                                                                                                                                                                                                       | 17   |

\* Author to whom correspondence should be addressed. Tel. 412-386-5771, Fax 412-386-5990, E-mail: yuhua.duan@netl.doe.gov

## A Fractional Coordinates

**Table S1:** Fractional coordinates for  $(CH_3NH_3)SnF_3$  with  $Pnma$  symmetry.

| <i>Elements</i> | Fractional Coordinates (Å) |          |          |
|-----------------|----------------------------|----------|----------|
|                 | <i>x</i>                   | <i>y</i> | <i>z</i> |
| <i>H</i>        | 0.064                      | 0.388    | 0.847    |
| <i>H</i>        | 0.963                      | 0.343    | 0.159    |
| <i>H</i>        | 0.837                      | 0.250    | 0.882    |
| <i>H</i>        | 0.204                      | 0.250    | 0.127    |
| <i>C</i>        | 0.034                      | 0.250    | 0.102    |
| <i>N</i>        | 0.996                      | 0.250    | 0.906    |
| <i>F</i>        | 0.278                      | 0.971    | 0.274    |
| <i>F</i>        | 0.044                      | 0.250    | 0.513    |
| <i>Sn</i>       | 1.000                      | 0.000    | 0.500    |

**Table S2:** Fractional coordinates for  $(CH_3NH_3)SnCl_3$  with  $Pnma$  symmetry.

| <i>Elements</i> | Fractional Coordinates (Å) |          |          |
|-----------------|----------------------------|----------|----------|
|                 | <i>x</i>                   | <i>y</i> | <i>z</i> |
| <i>H</i>        | 0.524                      | 0.324    | 0.851    |
| <i>H</i>        | 0.481                      | 0.329    | 0.137    |
| <i>H</i>        | 0.339                      | 0.250    | 0.902    |
| <i>H</i>        | 0.678                      | 0.250    | 0.083    |
| <i>C</i>        | 0.533                      | 0.250    | 0.079    |
| <i>N</i>        | 0.476                      | 0.250    | 0.910    |
| <i>Cl</i>       | 0.787                      | 0.975    | 0.281    |
| <i>Cl</i>       | 0.540                      | 0.250    | 0.496    |
| <i>Sn</i>       | 0.500                      | 0.000    | 0.500    |

**Table S3:** Fractional coordinates for  $(CH_3NH_3)SnBr_3$  with  $Pnma$  symmetry.

| <i>Elements</i> | Fractional Coordinates (Å) |          |          |
|-----------------|----------------------------|----------|----------|
|                 | <i>x</i>                   | <i>y</i> | <i>z</i> |
| <i>H</i>        | 0.010                      | 0.321    | 0.851    |
| <i>H</i>        | 0.984                      | 0.326    | 0.127    |
| <i>H</i>        | 0.837                      | 0.250    | 0.907    |
| <i>H</i>        | 0.169                      | 0.250    | 0.067    |
| <i>C</i>        | 0.031                      | 0.250    | 0.070    |
| <i>N</i>        | 0.967                      | 0.250    | 0.909    |
| <i>Br</i>       | 0.291                      | 0.976    | 0.284    |

|           |       |       |       |
|-----------|-------|-------|-------|
| <i>Br</i> | 0.037 | 0.250 | 0.490 |
| <i>Sn</i> | 1.000 | 0.000 | 0.500 |

**Table S4:** Fractional coordinates for  $(CH_3NH_3)SnI_3$  with *Pnma* symmetry.

| <i>Elements</i> | Fractional Coordinates (Å) |          |          |
|-----------------|----------------------------|----------|----------|
|                 | <i>x</i>                   | <i>y</i> | <i>z</i> |
| <i>H</i>        | 0.998                      | 0.316    | 0.855    |
| <i>H</i>        | 0.989                      | 0.321    | 0.119    |
| <i>H</i>        | 0.839                      | 0.250    | 0.916    |
| <i>H</i>        | 0.158                      | 0.250    | 0.053    |
| <i>C</i>        | 0.029                      | 0.250    | 0.062    |
| <i>N</i>        | 0.961                      | 0.250    | 0.912    |
| <i>I</i>        | 0.298                      | 0.978    | 0.292    |
| <i>I</i>        | 0.034                      | 0.250    | 0.485    |
| <i>Sn</i>       | 1.000                      | 0.000    | 0.500    |

**Table S5:** Fractional coordinates for  $(CH_3NH_3)PbF_3$  with *Pnma* symmetry.

| <i>Elements</i> | Fractional Coordinates (°A) |          |          |
|-----------------|-----------------------------|----------|----------|
|                 | <i>x</i>                    | <i>y</i> | <i>z</i> |
| <i>H</i>        | 0.058                       | 0.336    | 0.847    |
| <i>H</i>        | 0.971                       | 0.341    | 0.158    |
| <i>H</i>        | 0.832                       | 0.250    | 0.890    |
| <i>H</i>        | 0.209                       | 0.250    | 0.118    |
| <i>C</i>        | 0.040                       | 0.250    | 0.099    |
| <i>N</i>        | 0.993                       | 0.250    | 0.907    |
| <i>F</i>        | 0.290                       | 0.970    | 0.280    |
| <i>F</i>        | 0.052                       | 0.250    | 0.512    |
| <i>Pb</i>       | 1.000                       | 0.000    | 0.500    |

**Table S6:** Fractional coordinates for  $(CH_3NH_3)PbBr_3$  with *Pnma* symmetry.

| <i>Elements</i> | Fractional Coordinates (Å) <i>x</i> |          |       |
|-----------------|-------------------------------------|----------|-------|
|                 | <i>y</i>                            | <i>z</i> |       |
| <i>H</i>        | 0.509                               | 0.320    | 0.854 |
| <i>H</i>        | 0.484                               | 0.324    | 0.127 |
| <i>H</i>        | 0.336                               | 0.250    | 0.911 |
| <i>H</i>        | 0.667                               | 0.250    | 0.067 |
| <i>C</i>        | 0.530                               | 0.250    | 0.070 |
| <i>N</i>        | 0.466                               | 0.250    | 0.912 |

|           |       |       |       |
|-----------|-------|-------|-------|
| <i>Br</i> | 0.801 | 0.973 | 0.292 |
| <i>Br</i> | 0.542 | 0.250 | 0.489 |
| <i>Pb</i> | 0.500 | 0.000 | 0.500 |

**Table S7:** Fractional coordinates for  $(CH_3NH_3)PbI_3$  with *Pnma* symmetry.

| <i>Elements</i> | Fractional Coordinates (Å) |          |          |
|-----------------|----------------------------|----------|----------|
|                 | <i>x</i>                   | <i>y</i> | <i>z</i> |
| <i>H</i>        | 0.998                      | 0.315    | 0.858    |
| <i>H</i>        | 0.991                      | 0.320    | 0.119    |
| <i>H</i>        | 0.840                      | 0.250    | 0.920    |
| <i>H</i>        | 0.158                      | 0.250    | 0.053    |
| <i>C</i>        | 0.030                      | 0.250    | 0.062    |
| <i>N</i>        | 0.961                      | 0.250    | 0.915    |
| <i>I</i>        | 0.310                      | 0.975    | 0.301    |
| <i>I</i>        | 0.040                      | 0.250    | 0.485    |
| <i>Pb</i>       | 1.000                      | 0.000    | 0.500    |

**Table S8:** The optimized atomic coordinates and energies of AX and BX<sub>2</sub> (B=Sn, Pb; X= F, Cl, Br, I),.

| <i>Material</i>         | Spacegroup | Lattice Constant (Å) |          |          | Volume (Å <sup>3</sup> ) | Energy (eV)<br>( <i>formulation</i> ) |
|-------------------------|------------|----------------------|----------|----------|--------------------------|---------------------------------------|
|                         |            | <i>A</i>             | <i>B</i> | <i>C</i> |                          |                                       |
| <i>(MA)F</i>            | Pbcm       | 4.5839               | 4.6717   | 6.9091   | 145.4501                 | -45.03644                             |
| <i>(MA)Cl</i>           | Pbcm       | 5.4988               | 5.3658   | 7.7566   | 227.3162                 | -43.53056                             |
| <i>(MA)Br</i>           | Pbcm       | 5.7145               | 5.5862   | 8.0935   | 256.785                  | -42.96261                             |
| <i>(MA)I</i>            | Pbcm       | 6.0111               | 5.9031   | 8.5252   | 301.5837                 | -42.33157                             |
| <i>SnF<sub>2</sub></i>  | Pnma       | 4.5356               | 4.9523   | 11.0505  | 248.2138                 | -14.22044                             |
| <i>SnCl<sub>2</sub></i> | Pnma       | 5.6740               | 5.8095   | 13.3720  | 440.7834                 | -10.51250                             |
| <i>SnBr<sub>2</sub></i> | Pnma       | 5.9604               | 5.9668   | 13.2283  | 470.4643                 | -9.44487                              |
| <i>SnI<sub>2</sub></i>  | Pnma       | 6.3696               | 6.3693   | 13.4606  | 546.0927                 | -8.36619                              |
| <i>PbF<sub>2</sub></i>  | Pnma       | 4.7428               | 4.6413   | 12.0883  | 266.0966                 | -14.18718                             |
| <i>PbCl<sub>2</sub></i> | Pnma       | 5.7308               | 5.7328   | 13.8380  | 454.6211                 | -10.68565                             |
| <i>PbBr<sub>2</sub></i> | Pnma       | 6.0520               | 6.0544   | 13.9399  | 510.7766                 | -9.60245                              |
| <i>PbI<sub>2</sub></i>  | Pnma       | 6.4909               | 6.4943   | 13.9981  | 590.0778                 | -8.46915                              |

## B Bulk-Modulus

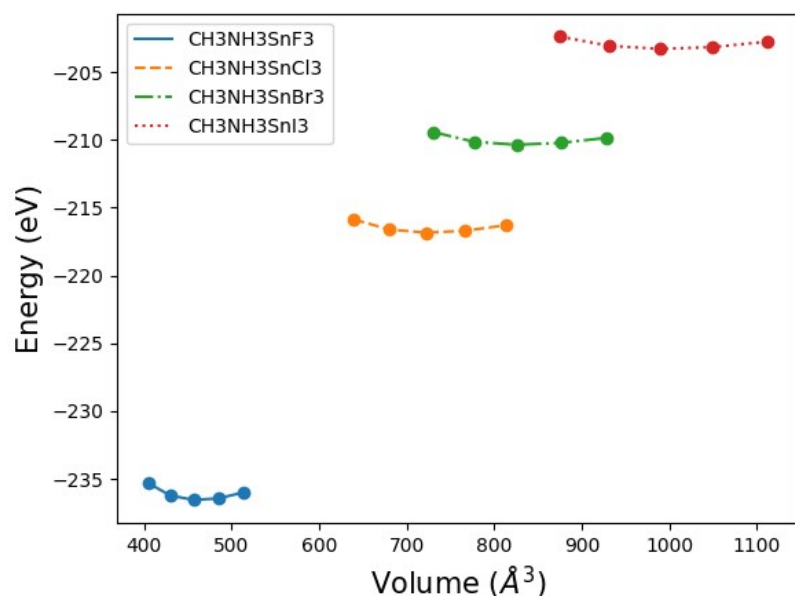

**Figure S1:** Energy versus volume for  $(\text{CH}_3\text{NH}_3)\text{SnX}_3$  ( $X=\text{F}, \text{Cl}, \text{Br}, \text{I}$ ) perovskites.

## C Band-structure and Density of States

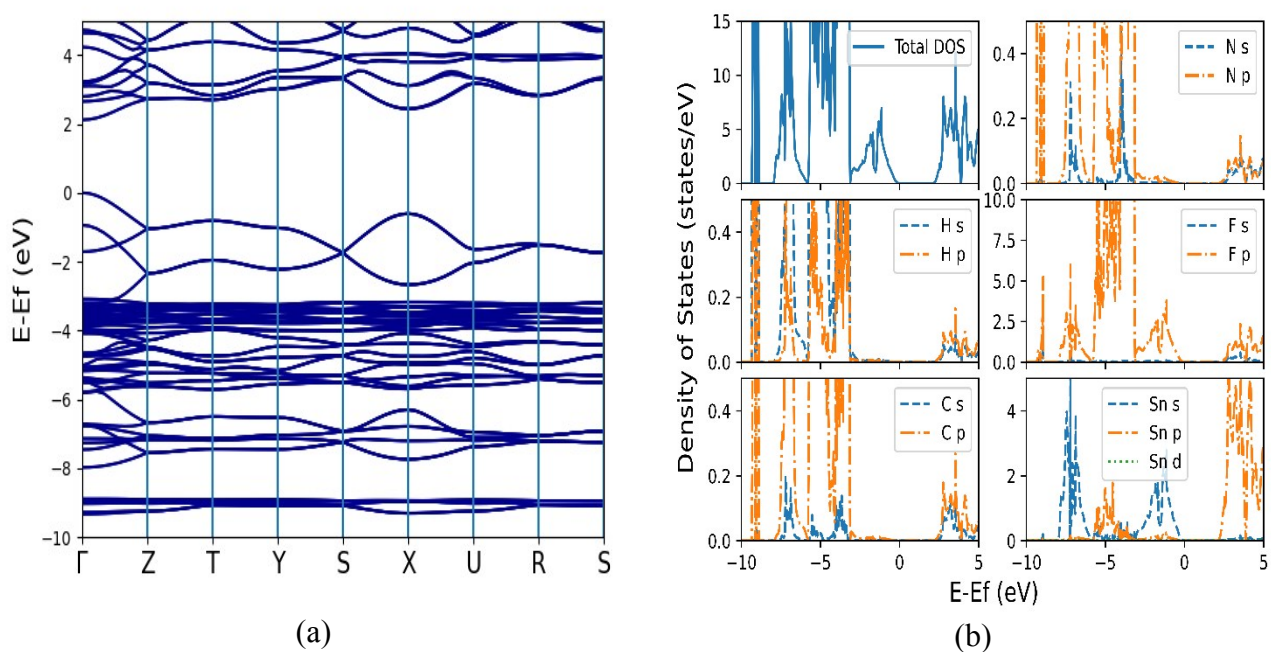

**Fig. S2:** The calculated electronic structural properties for  $(\text{MA})\text{SnF}_3$ : (a) band structure; (b) total and partial density of states.

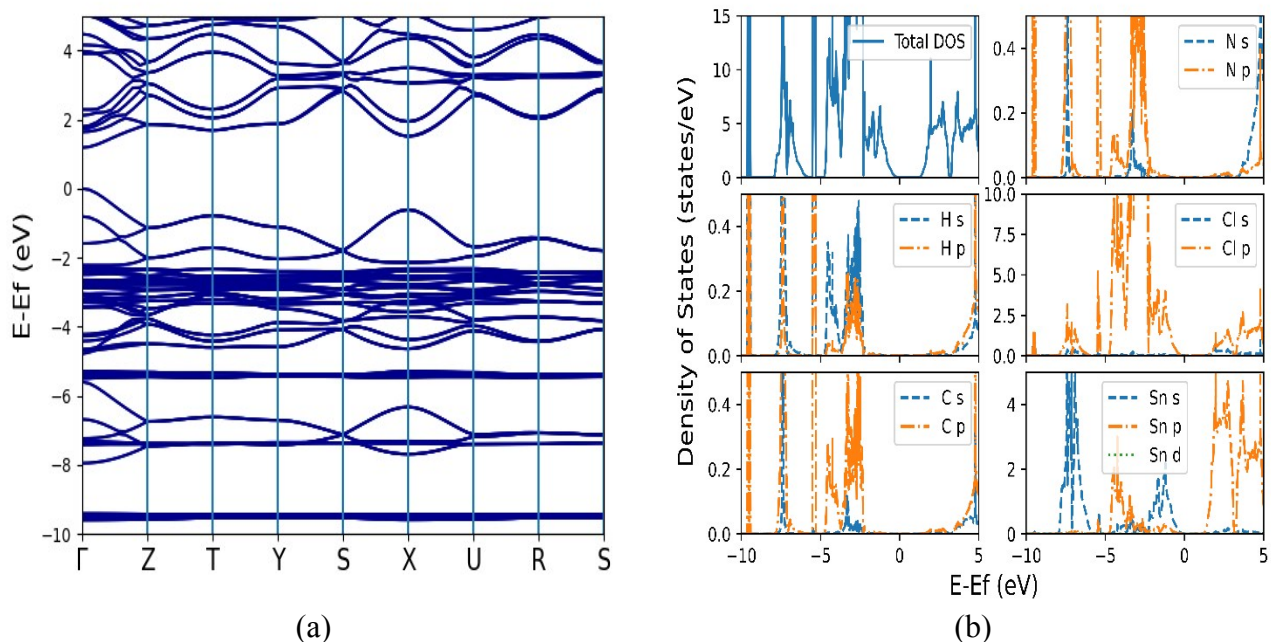

**Fig. S3:** The calculated electronic structural properties for (MA)SnCl<sub>3</sub>: (a) band structure; (b) total and partial density of states.

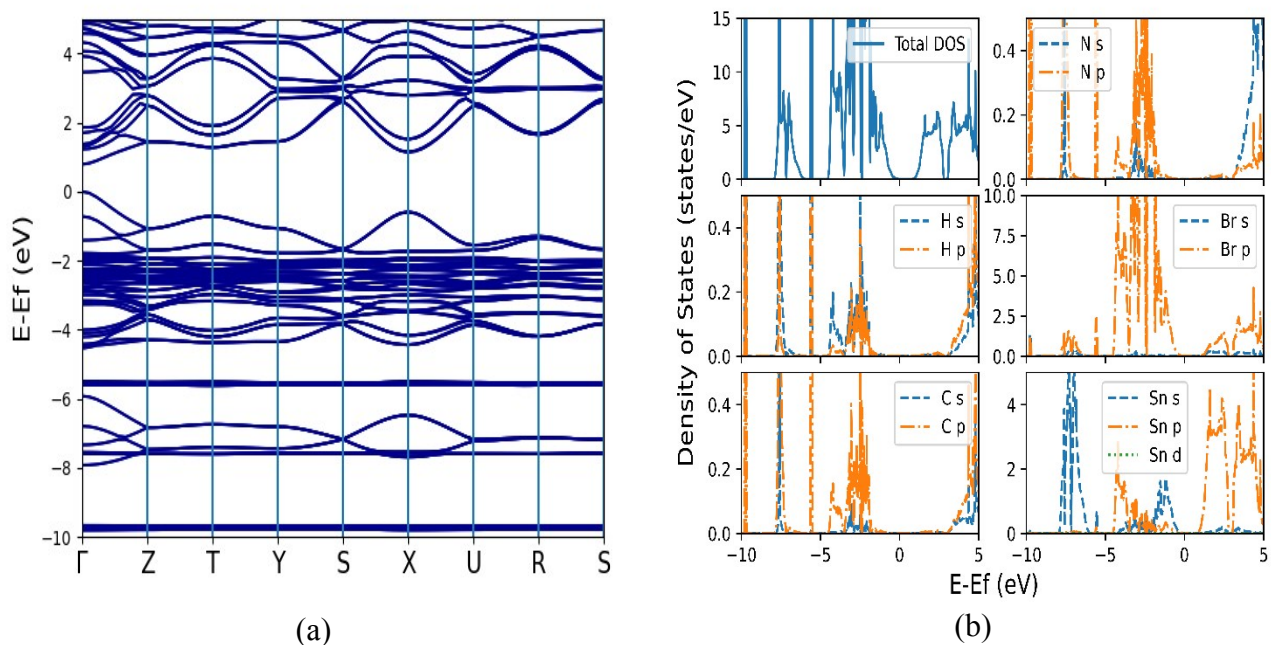

**Fig. S4:** The calculated electronic structural properties for (MA)SnBr<sub>3</sub>: (a) band structure; (b) total and partial density of states.

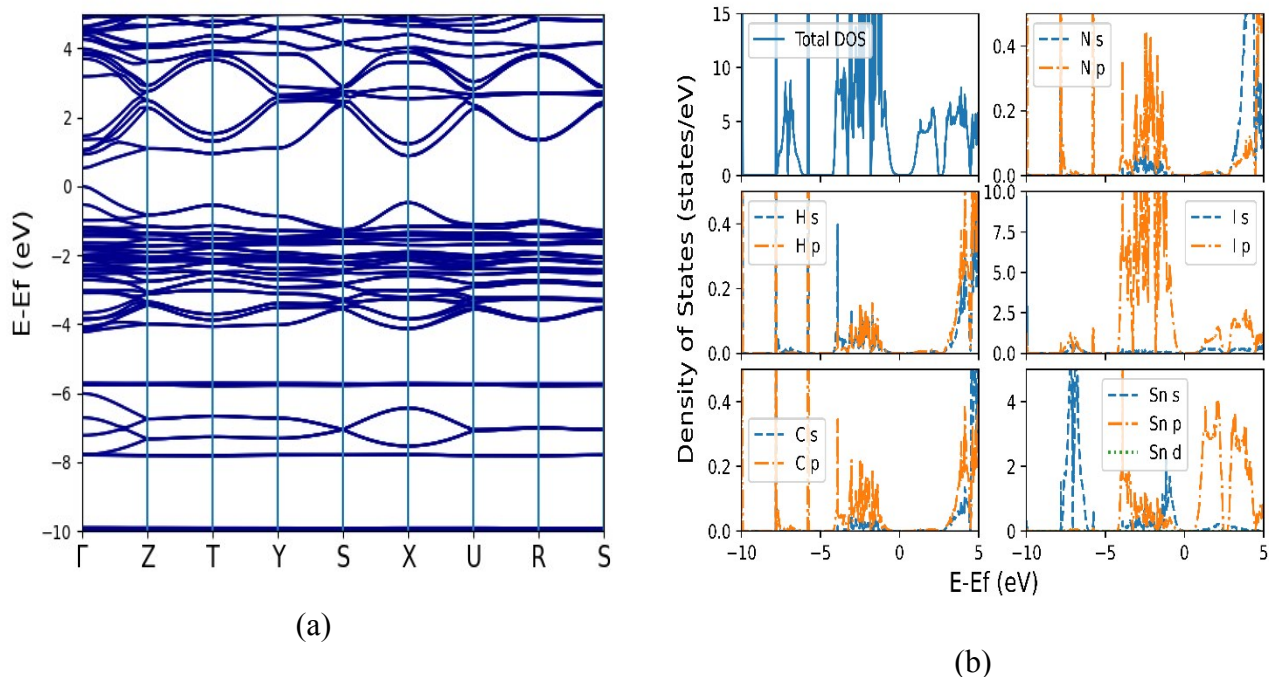

**Fig. S5:** The calculated electronic structural properties for (MA)SnI<sub>3</sub>: (a) band structure; (b) total and partial density of states.

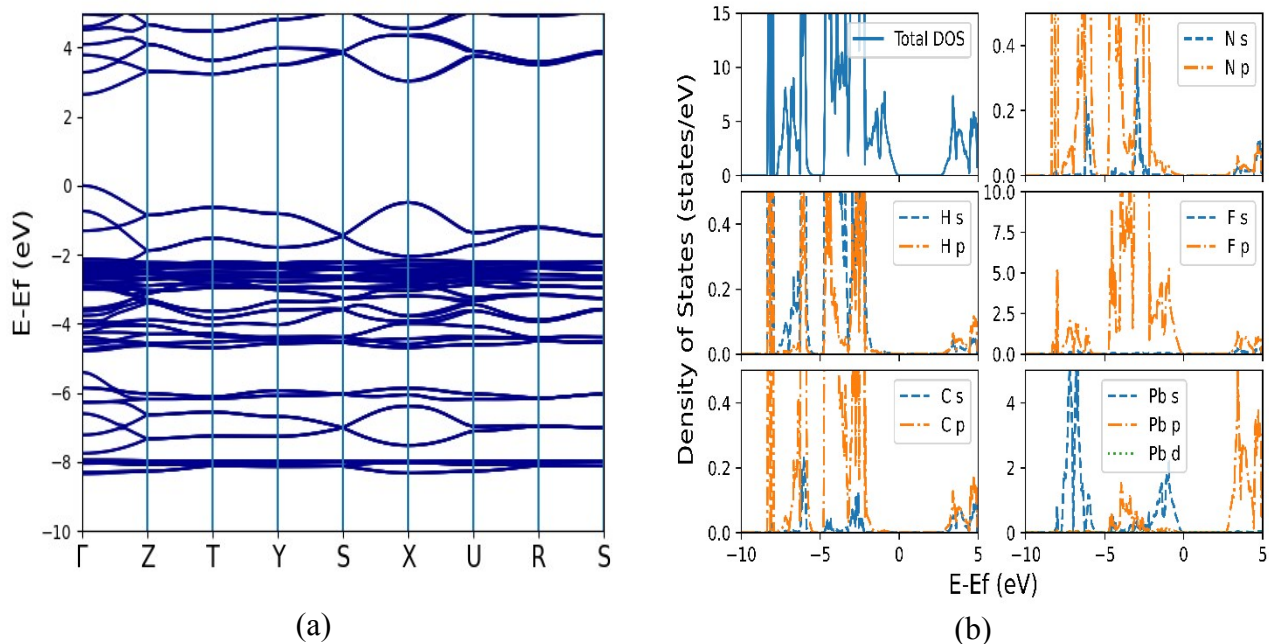

**Fig. S6:** The calculated electronic structural properties for (MA)PbF<sub>3</sub>: (a) band structure; (b) total and partial density of states.



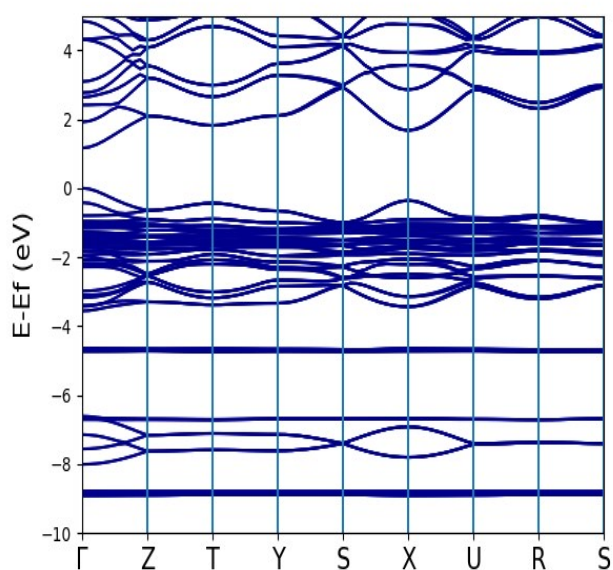

(a)

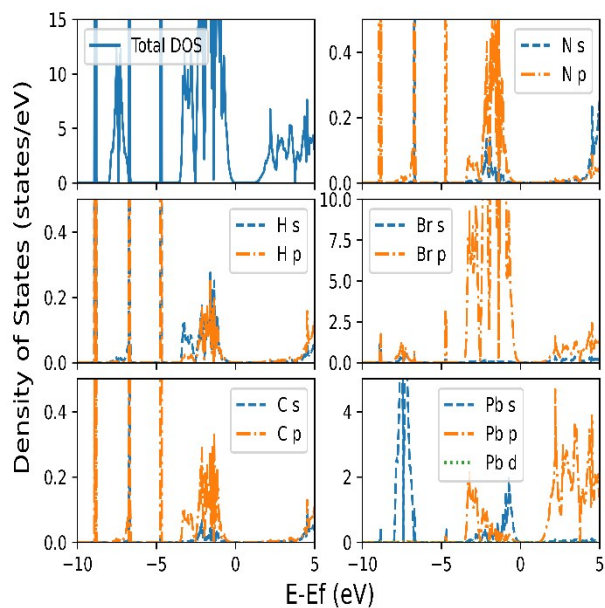

(b)

**Fig. S7:** The calculated electronic structural properties for (MA)PbBr<sub>3</sub>: (a) band structure; (b) total and partial density of states.

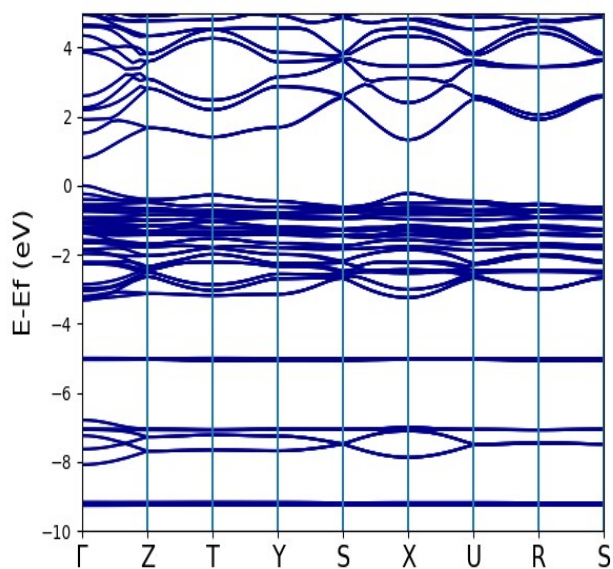

(a)

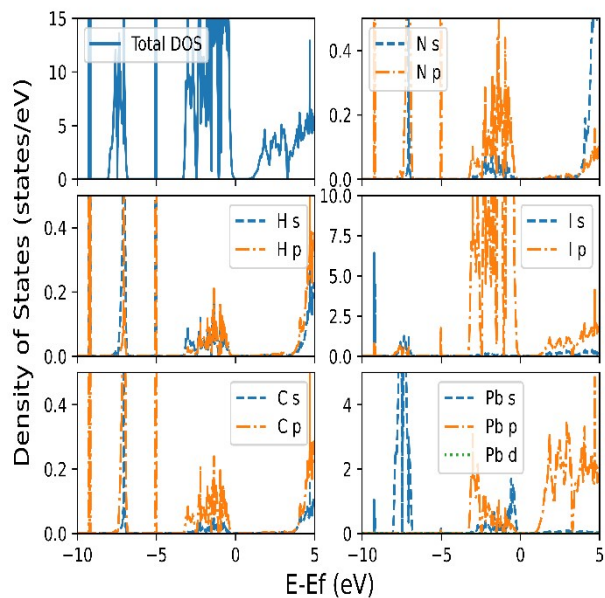

(b)

**Fig. S8:** The calculated electronic structural properties for (MA)PbI<sub>3</sub>: (a) band structure; (b) total and partial density of states.



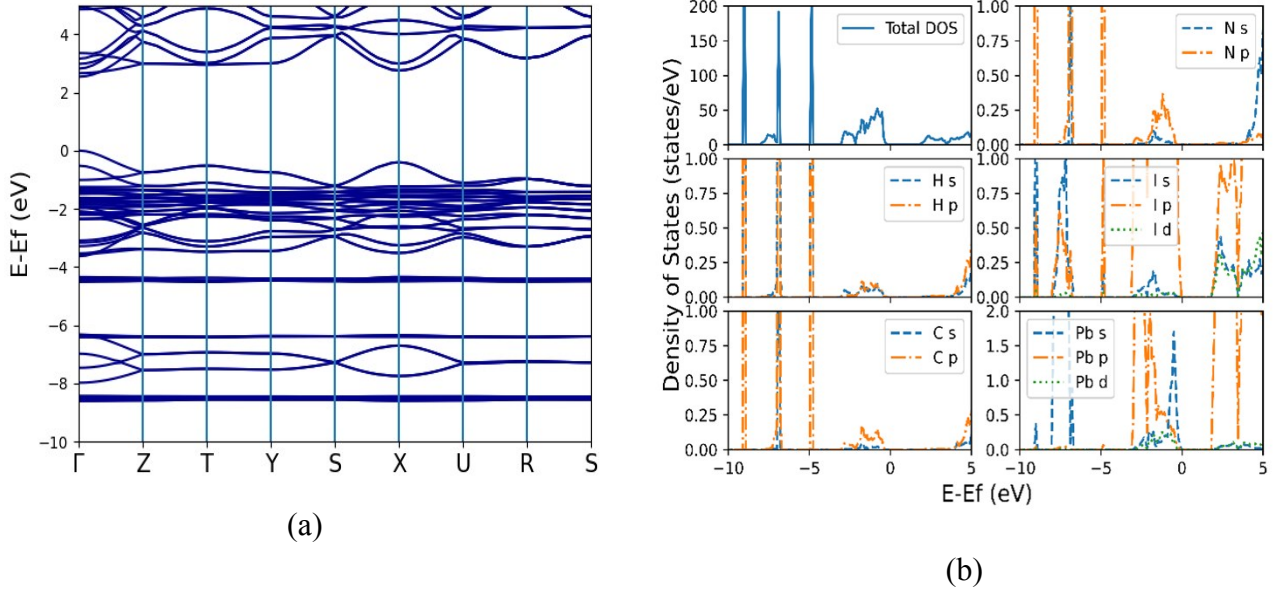

**Fig. S9:** The calculated electronic structural properties for (MA)PbCl<sub>3</sub>: (a) band structure; (b) total and partial density of states. Here, non-SOC calculations are presented for comparison with Figure 3 from the main document.

## D Optics

### D.1 Theory

To study the optical properties, the frequency-dependent dielectric matrix in the long wavelength limit ( $q \rightarrow 0$ ) can be calculated using the sum over states approach.<sup>1</sup> The formula for the imaginary part of the dielectric constant is a 3x3 Cartesian tensor

$$\epsilon_2^{\alpha\beta}(\omega) = \frac{4\pi^2 e^2}{\Omega} \lim_{q \rightarrow 0} \frac{1}{q^2} \sum_{c,v,k} 2\omega_k \delta(\epsilon_{ck} - \epsilon_{vk} - \omega) \times \langle u_{ck+e_\alpha q} | u_{vk} \rangle \langle u_{ck+e_\beta q} | u_{vk} \rangle^* \quad (1)$$

where the indices  $c$  and  $v$  correspond to the conduction and valence band states, respectively and  $u_{ck}$  is the periodic part of the orbitals at the  $k$ -point  $\kappa$ . The vector  $e_\alpha$  are unit vectors for the three Cartesian directions.  $\alpha$  and  $\beta$  refer to axis  $x, y, z$ . The real part of the dielectric constant tensor can be derived from the imaginary part using Kramers-Kronig relations:

$$\epsilon_1^{\alpha\beta}(\omega) = 1 + \frac{2}{\pi} P \int_0^\infty \frac{\epsilon_2^{\alpha\beta}(\omega') \omega'}{\omega'^2 - \omega^2} d\omega' \quad (2)$$

where  $P$  denotes the principal value. The real part of the optical conductivity ( $\sigma(\omega)$ ) is defined as

$$\sigma_1(\omega) = Re[\sigma(\omega)] = \frac{\omega}{4\pi} \epsilon_2(\omega) \quad (3)$$

where  $\sigma(\omega)$  and  $\omega$  are in the cgs unit of  $\text{sec}^{-1}$ . The cgs conductivity is  $9 \times 10^{11}$  times larger than the SI conductivity unit (Siemens/cm) which in the form of  $\sigma_1(\omega) = \frac{\varepsilon_2(\omega) \cdot \omega}{60}$  where  $\omega$  is in the unit of  $\text{cm}^{-1}$ . The corresponding imaginary part of  $\sigma(\omega)$  in SI unit is <sup>2</sup>

$$\sigma_2(\omega) = -\frac{\omega(\varepsilon_1(\omega) - 1)}{60} \quad (4)$$

The complex dielectric constant can be expressed as:

$$\varepsilon(\omega) = \varepsilon_1(\omega) + i\varepsilon_2(\omega) = \frac{4\pi i}{\omega} \sigma(\omega) = (\tilde{n} + ik)^2 \quad (5)$$

where  $\tilde{n}$  and  $k$  are the index of refraction and the extinction coefficient respectively, and can be evaluated by the calculated dielectric constants from equations (1) and (2).

$$\tilde{n} = \frac{1}{\sqrt{2}} (\varepsilon_1 + (\varepsilon_1^2 + \varepsilon_2^2)^{\frac{1}{2}})^{\frac{1}{2}} \quad (6)$$

$$\tilde{k} = \frac{1}{\sqrt{2}} (-\varepsilon_1 + (\varepsilon_1^2 + \varepsilon_2^2)^{\frac{1}{2}})^{\frac{1}{2}} \quad (7)$$

In the case of normal incidence, the reflectivity  $R$  and the absorption coefficient  $\alpha$  ( $\text{sec}^{-1}$  in cgs unit) in terms of  $\tilde{n}$  and  $k$  are defined as <sup>2</sup>

$$R = \frac{(\tilde{n} - 1)^2 + k^2}{(\tilde{n} + 1)^2 + k^2} \quad (8)$$

$$\alpha = \frac{2\omega k}{c} \quad (9)$$

In SI unit,  $\omega$  and  $\alpha$  are in  $\text{cm}^{-1}$ ,  $\alpha = 4\pi\omega k$ . In all cases, both the low frequency region  $\omega\tau \ll 1$  ( $\tau$  is the relaxation time) and the high frequency region  $\omega\tau \gg 1$  are extensively studied to analyze the exact ground state of the material as these two regions carry the signatures of two distinct mechanisms associated with optical conductivity within a solid. While the low frequency region is dominated by free carriers which are in abundance in a metal, the high frequency region is dominated by inter-band electronic transitions typical of a dielectric material. As in the limit  $\omega\tau \ll 1$ , both  $\tilde{n}$  and  $k$  become sufficiently large, for example, in a metallic conductor,

$$R = 1 - \frac{2}{\tilde{n}} \rightarrow 1 \quad (10)$$

which means that the conductor is characterized by its behavior as a perfect reflector with an exceedingly large absorption coefficient in the low frequency region.

## D.2 Halogen Comparisons

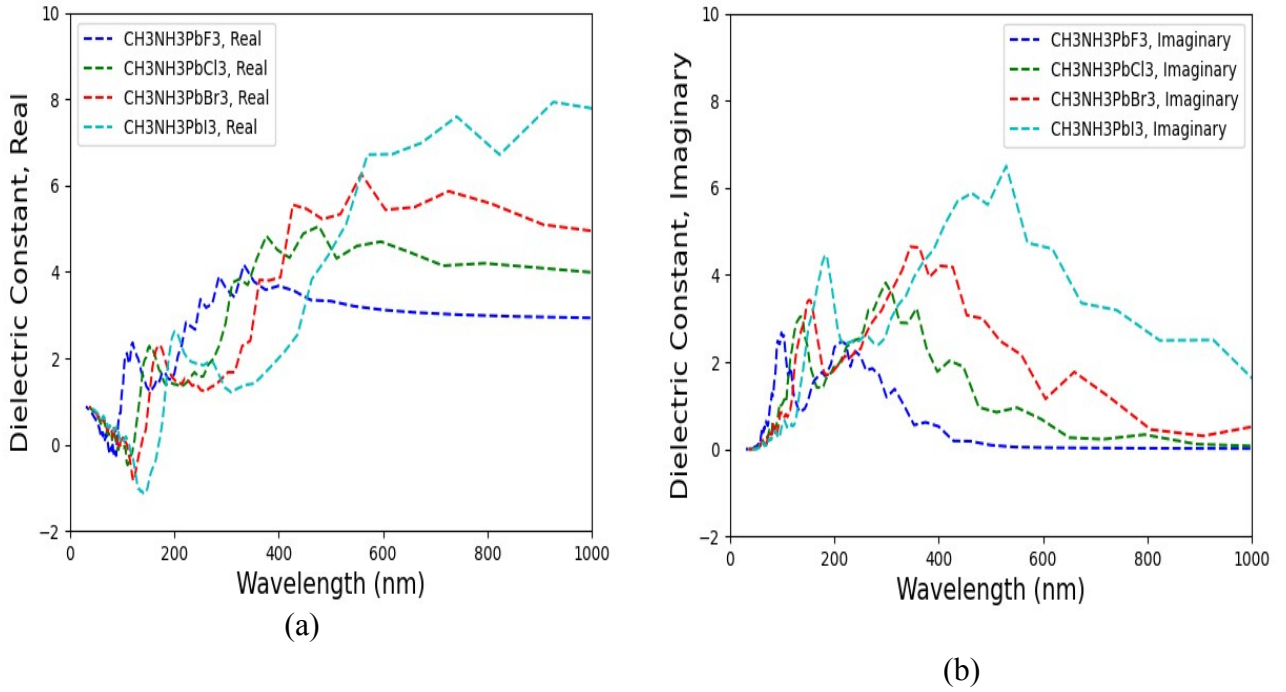

**Figure S10:** Real (a) and imaginary (b) dielectric constants for (CH<sub>3</sub>NH<sub>3</sub>)PbX<sub>3</sub> (X=F, Cl, Br, I) perovskites.

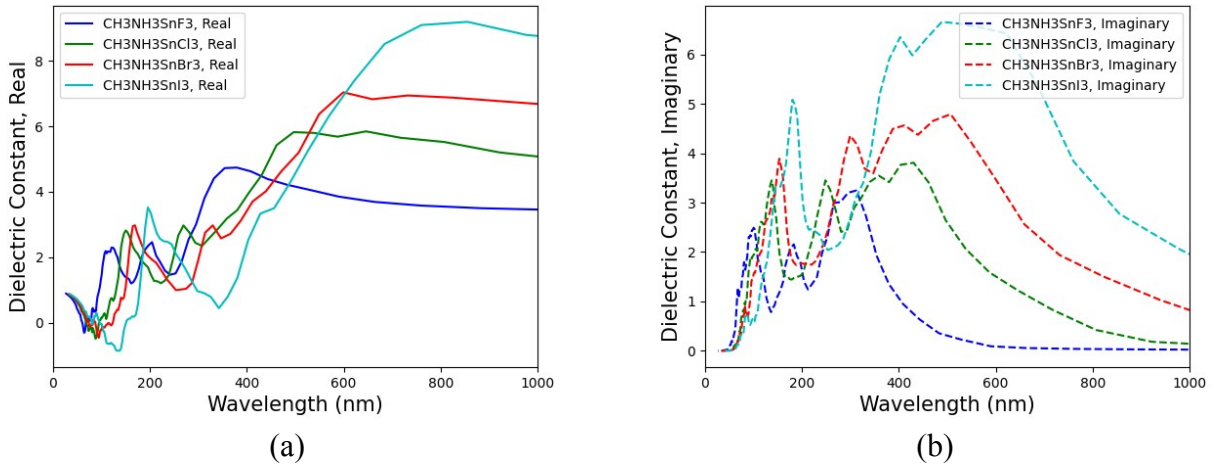

**Figure S11.** The calculated dielectric matrix (without SOC) of (MA)SnX<sub>3</sub> perovskites by taking the average of diagonal elements ( $\epsilon^{xx}$ ,  $\epsilon^{yy}$ ,  $\epsilon^{zz}$ ). (a) Real part  $\epsilon_1$ , (b) Imaginary part  $\epsilon_2$ . Here, non-SOC calculations are presented for comparison with Figure 5 from the main document.

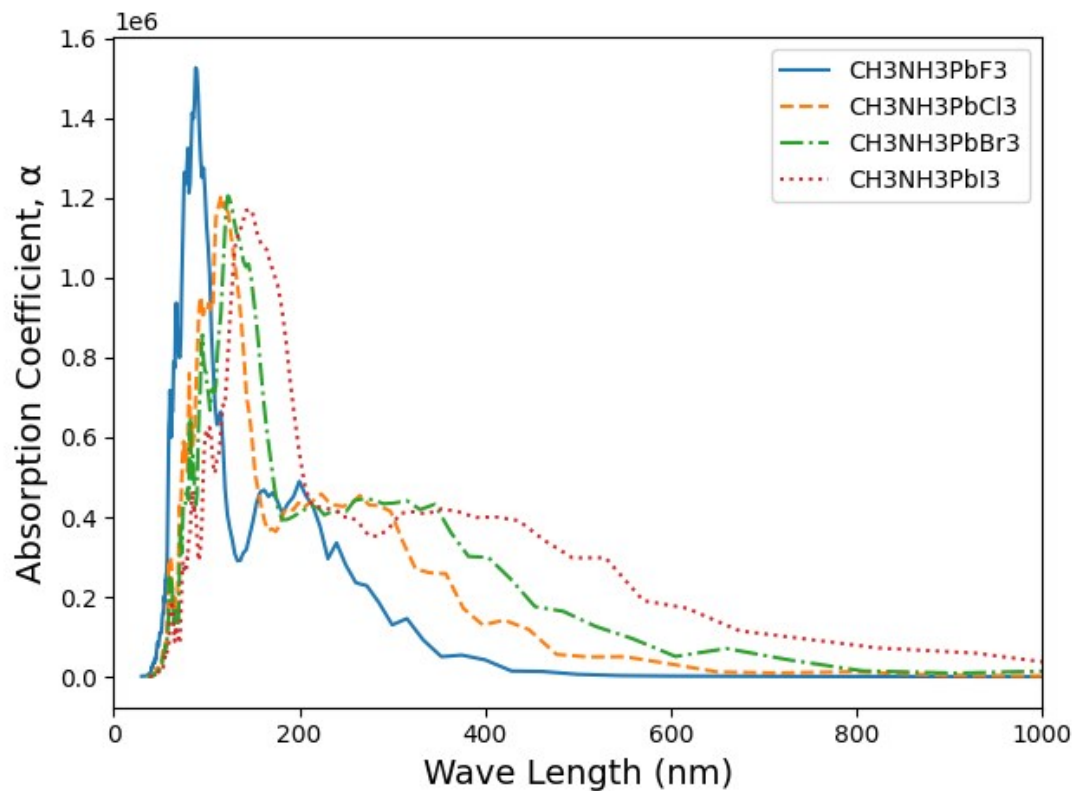

**Figure S12:** Absorption coefficients for  $(\text{CH}_3\text{NH}_3)\text{PbX}_3$  ( $X=\text{F}, \text{Cl}, \text{Br}, \text{I}$ ) perovskites.

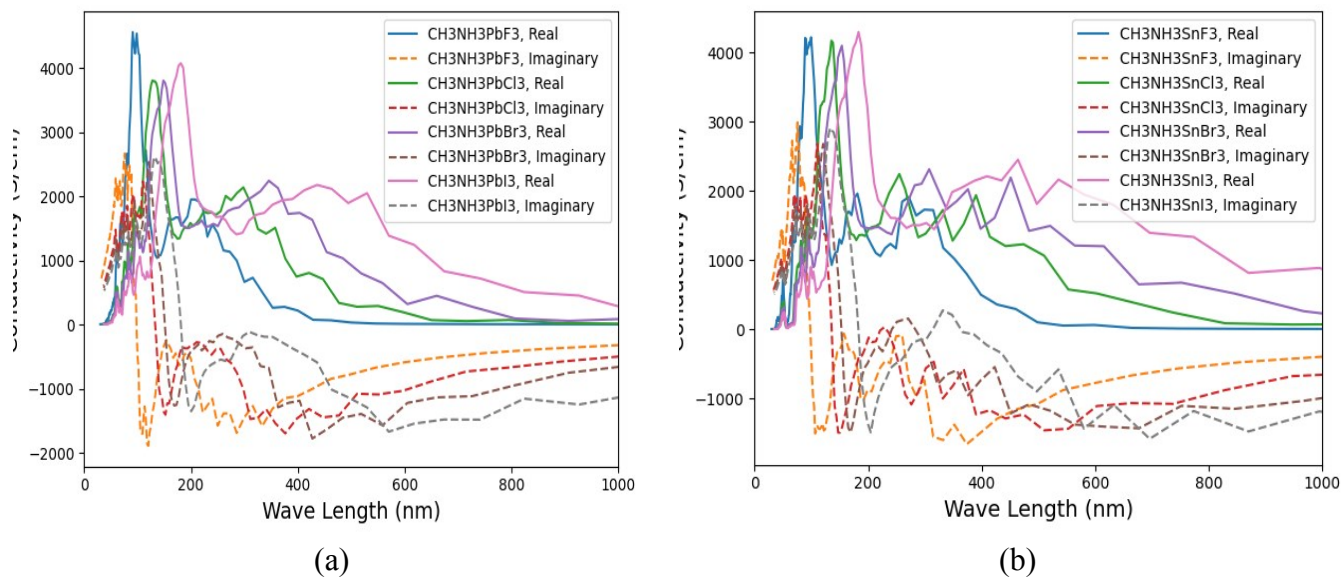

**Fig. S13** The calculated optical conductivities of (a)  $(\text{MA})\text{PbX}_3$ ; (b)  $(\text{MA})\text{SnX}_3$ .

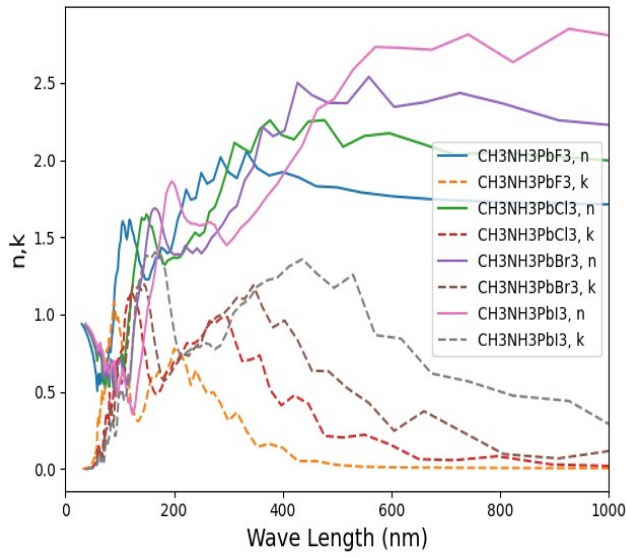

(a)

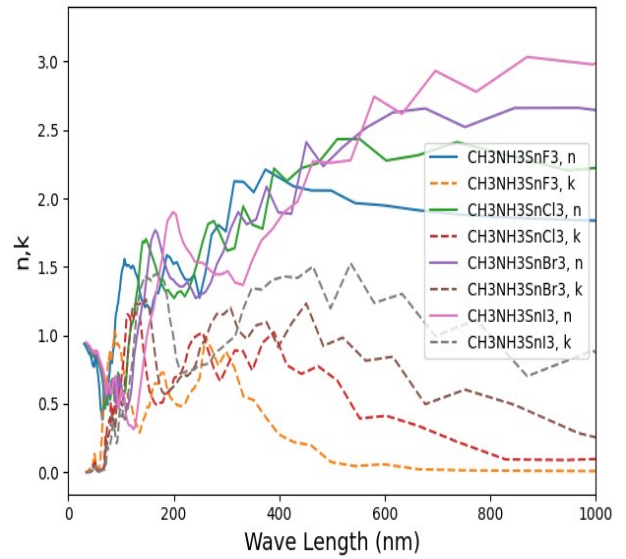

(b)

**Fig. S14** The calculated index of refraction (n) and the extinction coefficient (k) of (a) (MA)PbX<sub>3</sub>; (b) (MA)SnX<sub>3</sub>.

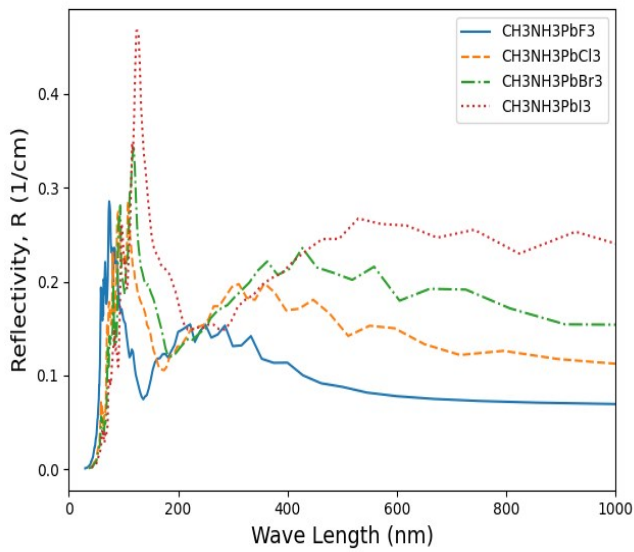

(a)

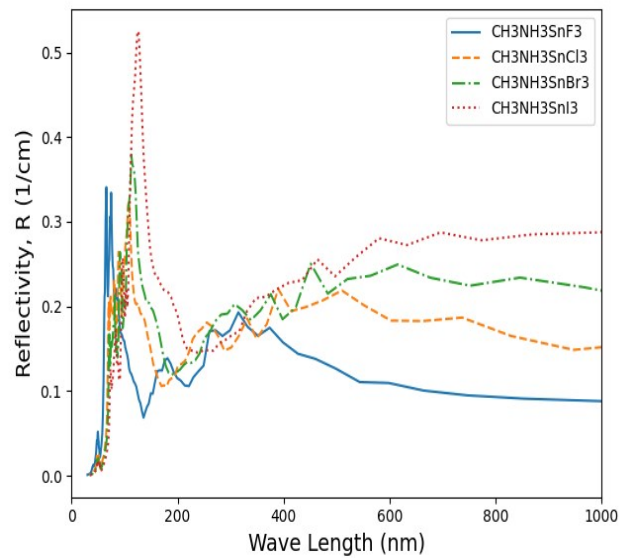

(b)

**Fig. S15** The calculated reflectivity (R) of (a) (MA)PbX<sub>3</sub>; (b) (MA)SnX<sub>3</sub>.

### D.3 Metal Comparisons

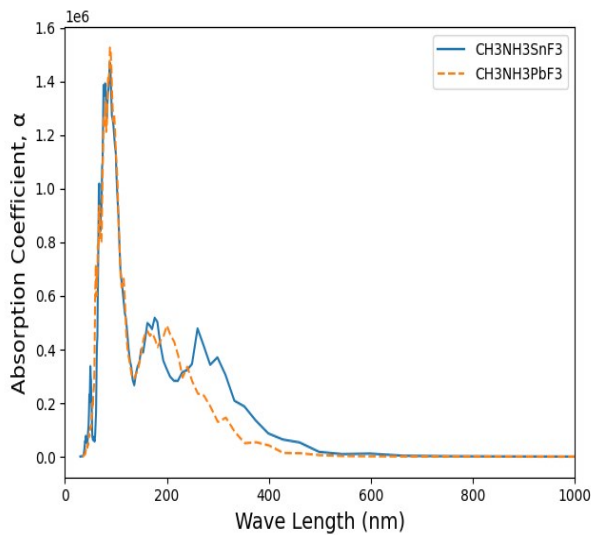

(a)

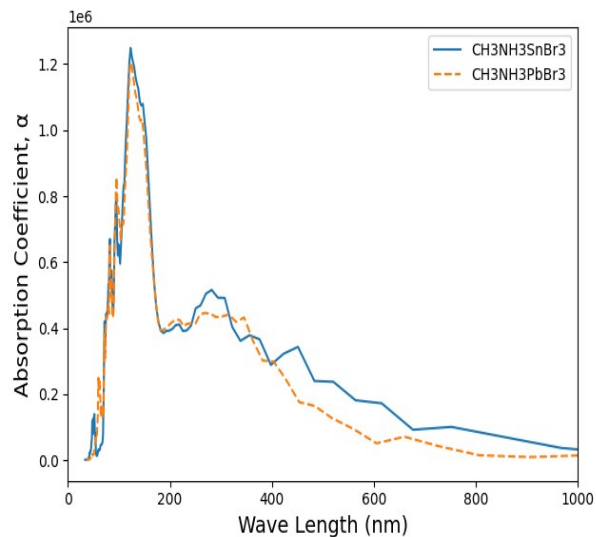

(b)

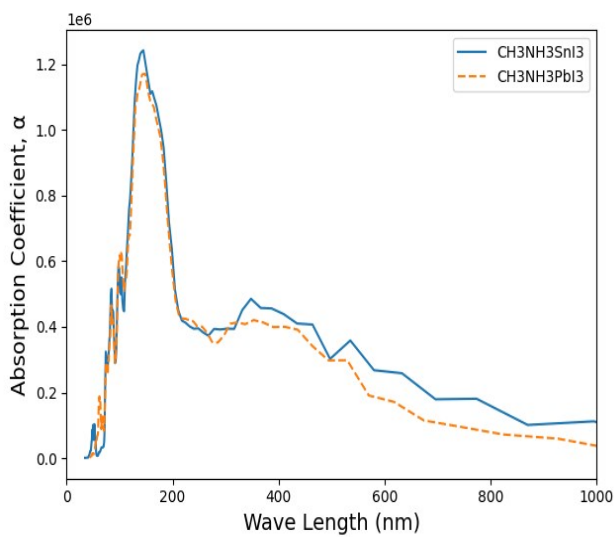

(c)

**Fig. S16** Comparison of Absorption coefficients of (a)  $(\text{MA})\text{BF}_3$ ; (b)  $(\text{MA})\text{BBr}_3$ ; and (c)  $(\text{MA})\text{BI}_3$ .



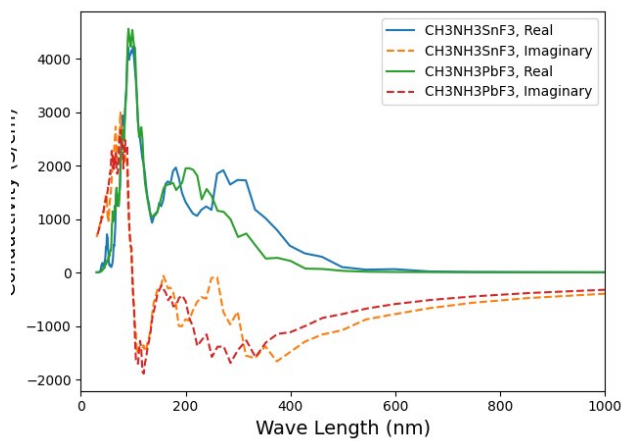

(a)

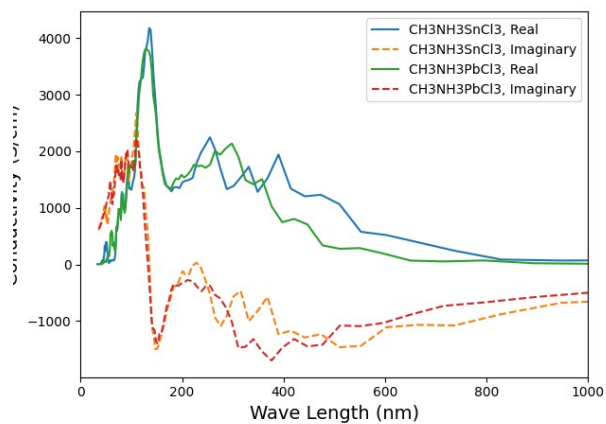

(b)

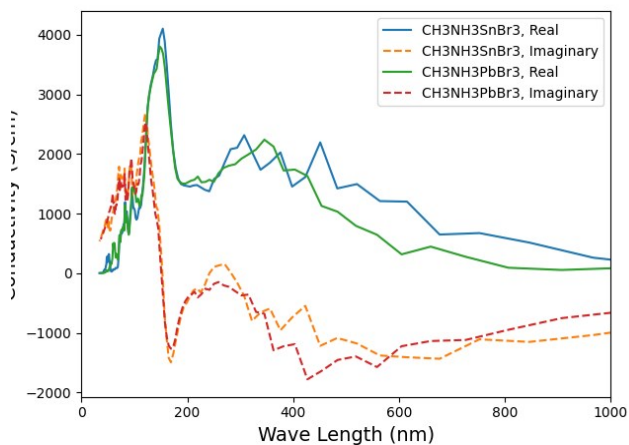

(c)

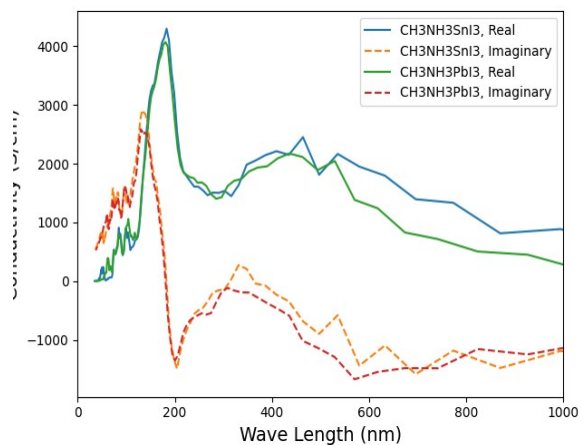

(d)

**Fig.S17.** Comparison of optical conductivity: (a) (MA)BF<sub>3</sub>; (b) (MA)BCl<sub>3</sub>; (c) (MA)BBr<sub>3</sub>; (d) (MA)BI<sub>3</sub>.

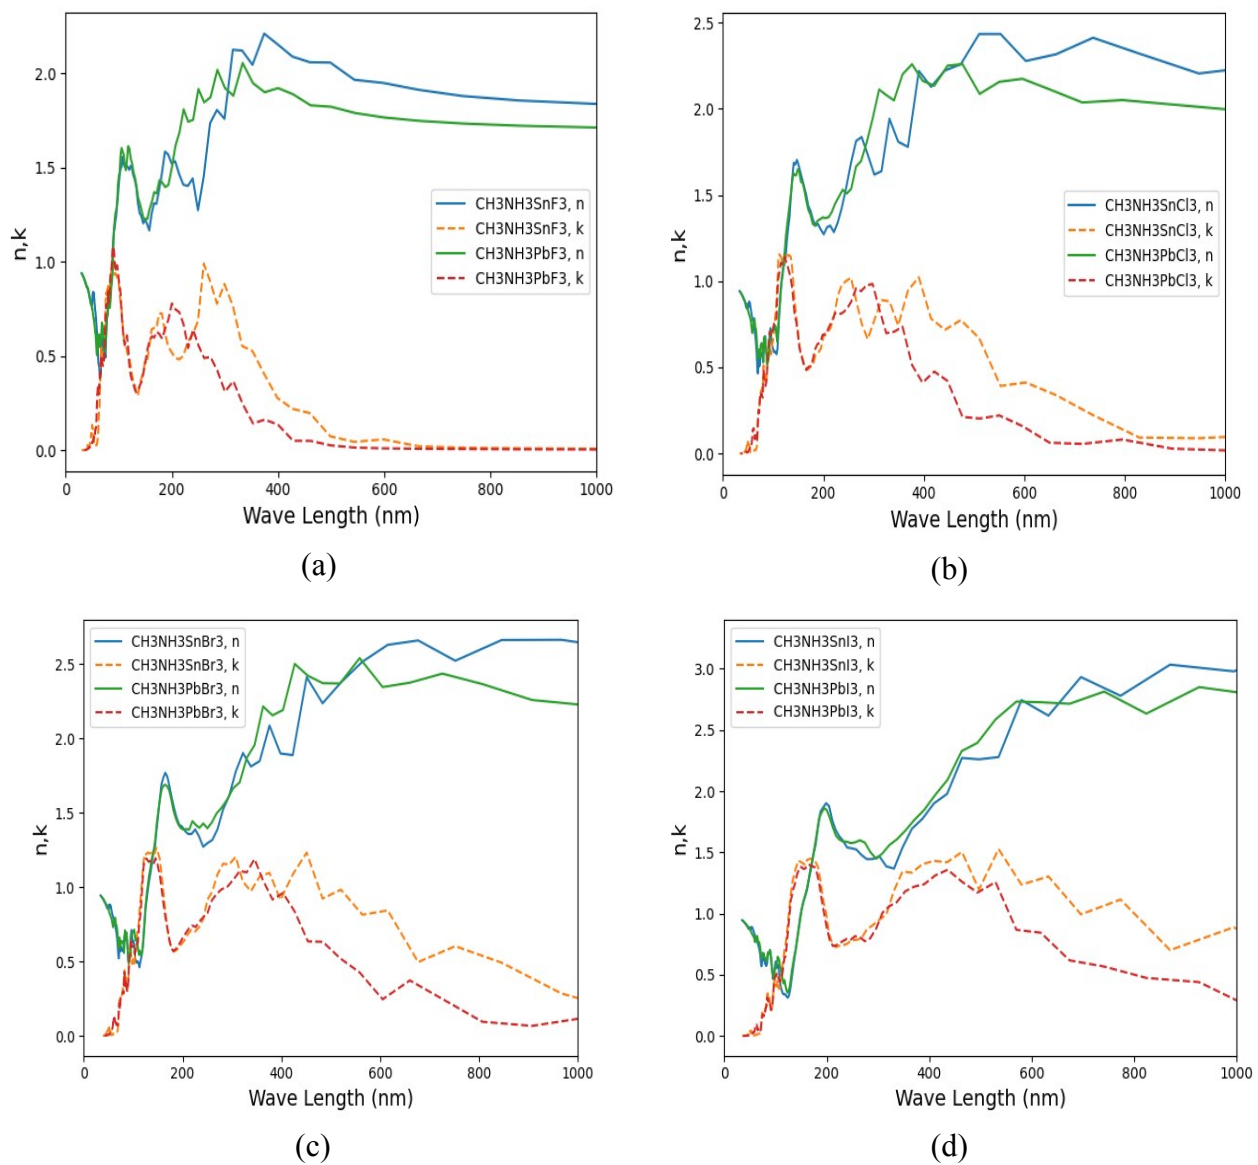

**Fig.S18.** Comparison of index of refraction ( $n$ ) and the extinction coefficient ( $k$ ): (a)  $(\text{MA})\text{BF}_3$ ; (b)  $(\text{MA})\text{BCl}_3$ ; (c)  $(\text{MA})\text{BBr}_3$ ; (d)  $(\text{MA})\text{BI}_3$ .

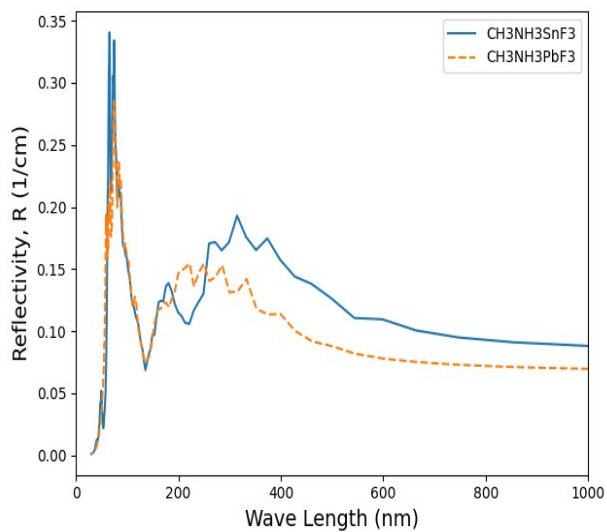

(a)

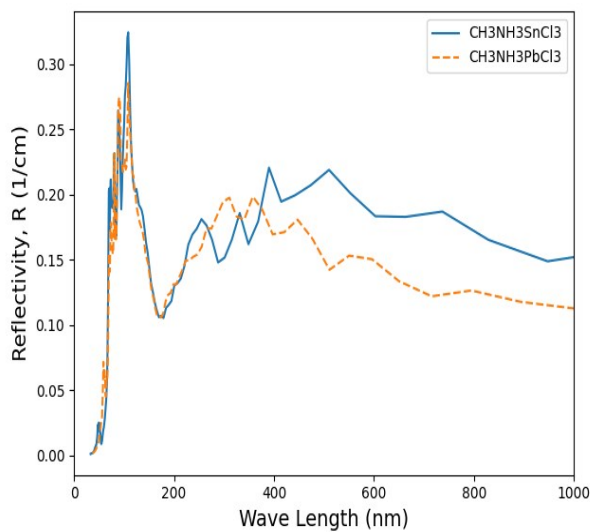

(b)

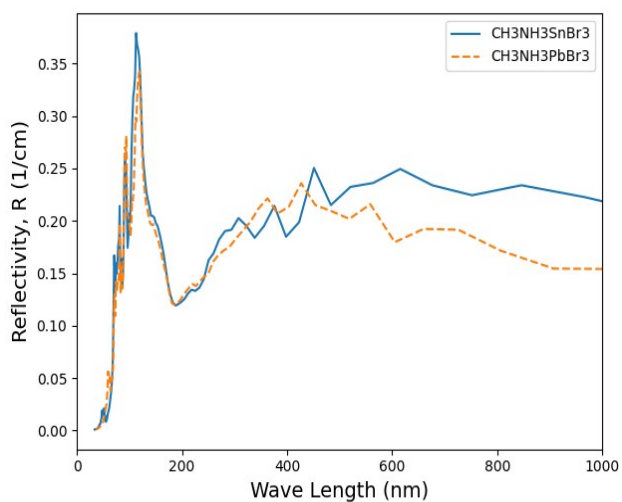

(c)

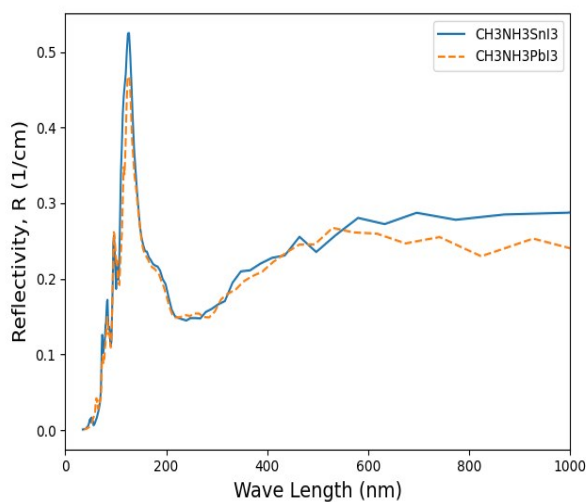

(d)

**Fig.S19.** Comparison of reflectivity ( $R$ ): (a)  $(\text{MA})\text{BF}_3$ ; (b)  $(\text{MA})\text{BCl}_3$ ; (c)  $(\text{MA})\text{BBr}_3$ ; (d)  $(\text{MA})\text{BI}_3$ .

**Reference:**

1. M. Gajdos, K. Hummer, G. Kresse, J. Furthmuller and F. Bechstedt, *Physical Review B*, 2006, **73**, 045112.
2. D. B. Tanner, in *Optical Effects in Solids*, Department of Physics, University of Florida, 2016.
